# Supplementary material
Source: PubMed Central journal article supplement (PMC5869128)
Supplement: NIHMS927111-supplement-supplement_1.pdf [file NIHMS927111-supplement-supplement_1.pdf]

**Table S1.** Consistency of Biospecimen Donor Mean Ratings of Issues Related to Research Use of Their Biospecimens by Site and by Gender of Respondents (N=302)

|                                                                            | Cancer Center Site         |                                   |                 |               | Donor Gender    |                   |
|----------------------------------------------------------------------------|----------------------------|-----------------------------------|-----------------|---------------|-----------------|-------------------|
|                                                                            | UNM <sup>a</sup><br>(n=61) | Winship<br>at<br>Emory<br>(n=126) | UPitt<br>(n=77) | BMC<br>(n=38) | Male<br>(n=131) | Female<br>(n=171) |
| <b>Donors' Ratings of Ethical Safeguards</b>                               |                            |                                   |                 |               |                 |                   |
| Amount of information provided in broad informed consent form <sup>b</sup> | 5.45                       | 5.66                              | 5.78            | 5.33          | 5.45            | 5.56              |
| Importance of expert review of studies using biospecimens <sup>c</sup>     | 7.95                       | 8.33                              | 8.53            | 8.71          | 7.88            | 8.19              |
| <b>Donors' Acceptability for Use of Donated Biospecimens<sup>d</sup></b>   |                            |                                   |                 |               |                 |                   |
| By for-profit companies                                                    | 5.54                       | 6.19                              | 5.76            | 5.82          | 6.20            | 5.46              |
| For genetic research that might help prevent or treat cancer               | 9.60                       | 9.45                              | 9.50            | 9.46          | 9.48            | 9.52              |
| For genetic research that might help prevent / treat other diseases        | 9.63                       | 9.49                              | 9.54            | 9.57          | 9.65            | 9.47              |
| <u>For research about:</u>                                                 |                            |                                   |                 |               |                 |                   |
| Any type of cancer                                                         | 9.79                       | 9.66                              | 9.70            | 9.41          | 9.61            | 9.67              |
| Any medical illness other than cancer                                      | 9.82                       | 9.57                              | 9.50            | 8.91          | 9.59            | 9.31              |
| Any type of mental illness                                                 | 9.78                       | 9.47                              | 9.56            | 8.29          | 9.46            | 9.09              |
| Any type of genetic research                                               | 9.81                       | 9.34                              | 9.49            | 8.39          | 9.29            | 9.22              |
| Any type of research on fertility                                          | 9.53                       | 9.31                              | 9.25            | 8.40          | 9.35            | 8.89              |
| <u>For research that:</u>                                                  |                            |                                   |                 |               |                 |                   |
| Changes some cells                                                         | 9.55                       | 9.17                              | 9.13            | 8.16          | 9.33            | 8.67              |
| Grows a cell line                                                          | 9.53                       | 9.43                              | 9.25            | 7.95          | 9.38            | 8.70              |
| Involves adult stem cell research                                          | 9.79                       | 9.53                              | 9.70            | 9.03          | 9.64            | 9.39              |
| <u>For use of donated biospecimens by researchers:</u>                     |                            |                                   |                 |               |                 |                   |
| At your institution                                                        | 9.84                       | 9.63                              | 9.61            | 9.04          | 9.67            | 9.40              |
| At other U.S. research institutions                                        | 9.70                       | 9.35                              | 9.16            | 8.70          | 9.20            | 9.25              |
| At for-profit companies                                                    | 6.61                       | 6.86                              | 7.29            | 5.82          | 7.12            | 6.16              |
| In other countries                                                         | 6.85                       | 6.02                              | 6.20            | 6.09          | 6.35            | 5.97              |
| <b>Donors' Concern that<sup>d</sup></b>                                    |                            |                                   |                 |               |                 |                   |
| Your biospecimen donation might be disclosed to others                     | 2.45                       | 3.24                              | 3.12            | 4.12          | 3.02            | 3.32              |
| Others might learn about your genes                                        | 2.16                       | 3.56                              | 2.95            | 4.02          | 3.11            | 3.36              |
| <b>Donors' Desire for Findings to Be Reported to Donors<sup>e</sup></b>    |                            |                                   |                 |               |                 |                   |
| In reports of general scientific results on website/newsletter             | 5.57                       | 7.02                              | 6.46            | 6.58          | 6.46            | 6.36              |
| Actionable genetic information regarding cancer                            | 9.00                       | 9.24                              | 9.11            | 7.81          | 9.18            | 8.40              |
| Actionable genetic information about other diseases                        | 9.07                       | 9.08                              | 8.80            | 7.06          | 8.80            | 8.20              |
| Non-actionable genetic information regarding cancer                        | 4.64                       | 4.98                              | 4.99            | 4.39          | 4.92            | 4.59              |
| Non-actionable genetic information about other diseases                    | 4.95                       | 4.56                              | 4.30            | 3.64          | 4.44            | 4.28              |

Notes:

<sup>a</sup> UNM = U. of New Mexico; Winship = Winship Cancer Institute of Emory Univ.;

UPitt = U. of Pittsburgh; BMC = Boston Medical Ctr.

<sup>b</sup> 0 = far too little information;      5 = just right amount of information      10 = far too much information

<sup>c</sup> 0 = not at all important;      5 = moderately important;      10 = extremely important

<sup>d</sup> 0 = not at all acceptable;      5 = moderately acceptable;      10 = completely acceptable

<sup>e</sup> 0 = not concerned at all;      5 = moderately concerned;      10 = very concerned

<sup>f</sup> 0 = definitely not want to know;      5 moderately want to know;      10 = definitely want to know
